# Supplementary material
Source: publisher figshare collection journal article supplement (https://acs.figshare.com/ndownloader/files/4423873)

*Supporting Information for:*

***Synthesis, Characterization, and Binding Property of Isoelectronic Analogues of Nucleobases, B(6)-Substituted 5-Aza-6-borauracils and -thymines***

**Hiroshi Ito,<sup>\*,†§</sup> Kyohei Yumura,<sup>†</sup> and Kazuhiko Saigo<sup>\*,†‡</sup>**

<sup>†</sup>*Department of Chemistry and Biotechnology, Graduate School of Engineering, The University of Tokyo, Hongo, Bunkyo-ku, Tokyo 113-8656, Japan*

<sup>‡</sup>*School of Environmental Science and Engineering, Kochi University of Technology, Miyanokuch, Tosayamada-cho, Kami-shi, Kochi 782-8502, Japan*

<sup>§</sup>*Present Address: Department of Chemistry, Graduate School of Science, Osaka City University, Sugimoto, Sumiyoshi-ku, Osaka-shi, Osaka 558-8585, Japan*

## **1. Materials and Instruments**

**Materials.** Mesitylborane,<sup>1</sup> hexylborane,<sup>2</sup> and methylbiuret<sup>3</sup> were synthesized according to the reported methods. Starting materials and dehydrated solvents were obtained from Tokyo Chemical Industry (Tokyo, Japan) or Wako Pure Chemical Industries (Osaka, Japan). Tetrahydrofuran (THF) was distilled from sodium wire and benzophenone before use. Silica gel (SiO<sub>2</sub>) for column chromatography was purchased from Merck (Darmstadt, Germany). Bio-beads SX-8 was purchased from Bio-Rad Laboratories (Richmond, USA).

**Instruments.** <sup>1</sup>H and <sup>13</sup>C{<sup>1</sup>H} NMR spectra were recorded on a Varian Mercury 300 spectrometer operating at 300 MHz for <sup>1</sup>H and 75 MHz for <sup>13</sup>C. <sup>11</sup>B NMR spectra were recorded on a JEOL Alpha 500 spectrometer operating at 160 MHz. Chemical shifts are reported in parts per million (δ) downfield from tetramethylsilane (TMS) for <sup>1</sup>H, the deuterated solvent for <sup>13</sup>C, and external BF<sub>3</sub>·OEt<sub>2</sub> for <sup>11</sup>B, respectively. IR spectra were recorded on a JASCO FT/IR-480plus

spectrophotometer. Absorption and fluorescence spectra were measured using a 10-mm quartz cell on a JASCO V-550 spectrophotometer and a JASCO FP-6500 spectropolarimeter, respectively. X-Ray data were collected on a Rigaku/MSU Mercury diffractometer with graphite monochromated Mo K $\alpha$  radiation. Melting points were measured on a Yamato melting point apparatus MP-21. Elemental analyses were performed at the Microanalytical Laboratory of Department of Chemistry, Graduate School of Science, The University of Tokyo.

## 2. Synthetic Procedures

**MesU<sub>BN</sub>**. A solution of mesitylborane in dry THF (0.20 M, 10 mL, 2.0 mmol) was added dropwise to biuret (206 mg, 2.0 mmol) at rt. After the mixture was stirred at room temperature overnight, the solvent was evaporated to dryness. The residue was purified by recycling GPC (JAIGEL 1H+2H, CHCl<sub>3</sub>) to afford **MesU<sub>BN</sub>** (118 mg, 26% yield) as a white solid. Mp over 220 °C. IR (KBr, cm<sup>-1</sup>) 3427, 3361, 3206, 3087, 2919, 2853, 1723, 1699, 1498, 1446, 1413, 1308, 1236, 1154, 1046, 933, 854, 517, 433. <sup>1</sup>H NMR (300 MHz, 10 mM, CDCl<sub>3</sub>)  $\delta$  7.92 (br-s, 1H, NH), 6.87 (s, 2H, Ar-H), 6.60 (br-s, 2H, NH), 2.29 (s, 3H, Ar-CH<sub>3</sub>), 2.28 (s, 6H, Ar-CH<sub>3</sub>). <sup>13</sup>C NMR (75 MHz, CDCl<sub>3</sub>)  $\delta$  153.14, 140.31, 140.06, 127.89, 22.31, 21.34. <sup>11</sup>B NMR (160 MHz, CDCl<sub>3</sub>)  $\delta$  35.10. Anal. Calcd for C<sub>11</sub>H<sub>14</sub>BN<sub>3</sub>O<sub>2</sub>·1/4CHCl<sub>3</sub>: C, 51.79; H, 5.51; N, 16.11. Found: C, 51.53; H, 5.58; N, 16.09.

**MesT<sub>BN</sub>**. A solution of mesitylborane in dry THF (0.50 M, 48 mL, 24 mmol) was added dropwise to methylbiuret (2.68 g, 22.9 mmol) at 0 °C. After the mixture was stirred at room temperature overnight, the solvent was evaporated to dryness. The residue was purified by column chromatography (SiO<sub>2</sub>, hexane/THF = 4/1 to 1/1 (v/v)), recycling GPC (JAIGEL 1H+2H, CHCl<sub>3</sub>), and then recrystallization (CHCl<sub>3</sub>/hexane) to afford **MesT<sub>BN</sub>** (1.46 g, 26% yield) as a white

solid. Mp over 220 °C. IR (KBr,  $\text{cm}^{-1}$ ) 3244, 3066, 2920, 2855, 1724, 1697, 1612, 1560, 1448, 1412, 1375, 1277, 1144, 1028, 847, 780, 651, 597, 527, 472, 418.  $^1\text{H}$  NMR (300 MHz, 20 mM,  $\text{CDCl}_3$ )  $\delta$  8.48 (br-s, 1H, NH), 6.87 (s, 2H, Ar-H), 6.68 (br-s, 1H, NH), 2.90 (s, 3H, N- $\text{CH}_3$ ), 2.30 (s, 3H, Ar- $\text{CH}_3$ ), 2.22 (s, 6H, Ar- $\text{CH}_3$ ).  $^{13}\text{C}$  NMR (75 MHz,  $\text{CDCl}_3$ )  $\delta$  154.68, 152.97, 139.82, 139.28, 127.77, 31.13, 21.95, 21.36.  $^{11}\text{B}$  NMR (160 MHz,  $\text{CDCl}_3$ )  $\delta$  35.61. Anal. Calcd for  $\text{C}_{12}\text{H}_{16}\text{BN}_3\text{O}_2$ : C, 58.81; H, 6.58; N, 17.15. Found: C, 58.59; H, 6.52; N, 17.15.

**1,5-dimethylbiuret.** A mixture of *N*-ethoxycarbonylurethane (2.87 g, 17.8 mmol) and aqueous methylamine (23 mL, 40%wt.) was stirred overnight at room temperature. The solvent was removed under reduced pressure. The residue was recrystallized from  $\text{CHCl}_3$ /hexane to afford 1,5-dimethylbiuret (0.677 g, 29% yield) as a white solid.  $^1\text{H}$  NMR (300 MHz,  $\text{DMSO}-d_6$ , 25 °C)  $\delta$  8.68 (br-s, 1H, NH), 7.18 (br-s, 2H, NH), 2.62 (d,  $J = 4.2$  Hz, 6H,  $\text{CH}_3$ ).

**$\mathbf{m}^1\text{MesT}_{\text{BN}}$ .** A solution of mesitylborane in dry THF (0.20 M, 10 mL, 2.0 mmol) was added dropwise to 1,5-dimethylbiuret (262 mg, 2.0 mmol) at rt. After the mixture was stirred at room temperature overnight, the solvent was evaporated to dryness. The residue was purified by recycling GPC (JAIGEL 1H+2H,  $\text{CHCl}_3$ ) to afford  $\mathbf{m}^1\text{MesT}_{\text{BN}}$  (225 mg, 43% yield) as a white solid. Mp 209–212 °C. IR (KBr,  $\text{cm}^{-1}$ ) 3437, 3201, 3066, 2921, 1733, 1709, 1611, 1483, 1450, 1415, 1391, 1258, 1178, 1150, 1025, 769, 736, 655.  $^1\text{H}$  NMR (300 MHz, 10 mM,  $\text{CDCl}_3$ ) 7.77 (br-s, 1H, NH), 6.89 (s, 2H, Ar-H), 2.86 (s, 6H, N- $\text{CH}_3$ ), 2.31 (s, 3H, Ar- $\text{CH}_3$ ), 2.16 (s, 6H, Ar- $\text{CH}_3$ ).  $^{13}\text{C}$  NMR (75 MHz,  $\text{CDCl}_3$ )  $\delta$  154.40, 139.43, 139.41, 127.86, 31.43, 21.62, 21.38.  $^{11}\text{B}$  NMR (160 MHz,  $\text{CDCl}_3$ )  $\delta$  36.53. Anal. Calcd for  $\text{C}_{13}\text{H}_{18}\text{BN}_3\text{O}_2$ : C, 60.26; H, 7.00; N, 16.22. Found: C, 60.15; H, 7.08; N, 16.14.

**ThxT<sub>BN</sub>**. A solution of 2,3-dimethylbut-2-ene in THF (1.0 M, 10 mL, 10 mmol) was added dropwise to a solution of BH<sub>3</sub>·THF in THF (1.0 M, 10 mL, 10 mmol) in a period of 10 min at 0 °C, and the mixture was stirred for 1 h at 0 °C. The resultant solution was added dropwise to methylbiuret (1.17 g, 10.0 mmol) at 0 °C. After the mixture was stirred at room temperature overnight, the solvent was evaporated to dryness. The residue was washed with dry hexane and purified by SEC (Bio-Beads S-X8, CHCl<sub>3</sub>) and recycling GPC (JAIGEL 1H+2H, CHCl<sub>3</sub>) to afford **ThxT<sub>BN</sub>** (1.10 g, 52% yield) as a white solid. Mp 132-135 °C. IR (KBr, cm<sup>-1</sup>) 3421, 3270, 3200, 3066, 2960, 2873, 1725, 1687, 1469, 1416, 1394, 1375, 1355, 1264, 1063, 1035, 997, 869, 786, 758, 658, 601, 547, 490, 479, 447. <sup>1</sup>H NMR (300 MHz, CDCl<sub>3</sub>, 25 °C) δ 8.90 (br-s, 1H, NH), 6.67 (br-s, 1H, NH), 3.21 (s, 3H, N-CH<sub>3</sub>), 2.04 (m, 1H, thexyl), 1.02 (s, 6H, thexyl), 0.85 (d, *J* = 6.8 Hz, 6H, thexyl). <sup>13</sup>C NMR (75 MHz, CDCl<sub>3</sub>, 25 °C) δ 155.94, 153.65, 33.03, 31.86, 21.61, 18.48. <sup>11</sup>B NMR (160 MHz, CDCl<sub>3</sub>, 25 °C) δ 36.93. Anal. Calcd for C<sub>9</sub>H<sub>18</sub>BN<sub>3</sub>O<sub>2</sub>: C, 51.21; H, 8.60; N, 19.91. Found: C, 51.00; H, 8.71; N, 19.93.

### 3. X-ray Crystallography

The single crystals (**MesU<sub>BN</sub>**, **MesT<sub>BN</sub>** and **MesT<sub>BN</sub>·DAP**) were prepared by a slow evaporation method from a chloroform–hexane solution at rt. Details of the crystal data and a summary of the intensity data collection parameters for **MesU<sub>BN</sub>**, **MesT<sub>BN</sub>** and **MesT<sub>BN</sub>·DAP** are listed in Tables S1–3. In each case a suitable crystal was mounted with a mineral oil to the glass fiber and attached to the goniometer of a Rigaku Mercury CCD diffractometer with graphite-monochromated Mo Kα radiation ( $\lambda = 0.71069$  Å). The structures were solved by direct methods with SIR-97<sup>4</sup> and refined by full-matrix least-squares techniques against  $F^2$  (SHELXL-97).<sup>5</sup> The intensities were corrected for Lorentz and polarization effects. The non-hydrogen atoms were refined anisotropically. Hydrogen atoms were refined isotropically in the difference Fourier maps or placed using AFIX instructions.

## References and Notes

- (1) Matsumi, N.; Chujo, Y. *Polym. Bull.* **1997**, 38, 531–536.
- (2) Schwier, J. R.; Brown, H. C. *J Org. Chem.* **1993**, 58, 1546–1552.
- (3) Renis, H. E.; Skulnic, H. I. U.S. Patent 4239753, **1980**.
- (4) A Itomare, A.; Burla, M. C.; Camalli, M.; Cascarano, G. L.; Giacovazzo, C.; Guagliardi, A.; Moliterni, A. G. G.; Polidori, G.; Spagna, R. *J. Appl. Cryst.* **1999**, 32, 115–119.
- (5) Sheldrick, G. M.; University of Göttingen: Göttingen, Germany, 1997.

#### 4. Crystal Structure of MesU<sub>BN</sub>, and MesT<sub>BN</sub> and MesT<sub>BN</sub>·DAP

**Table S1.** Crystallographic data and structure refinement details for MesU<sub>BN</sub>.

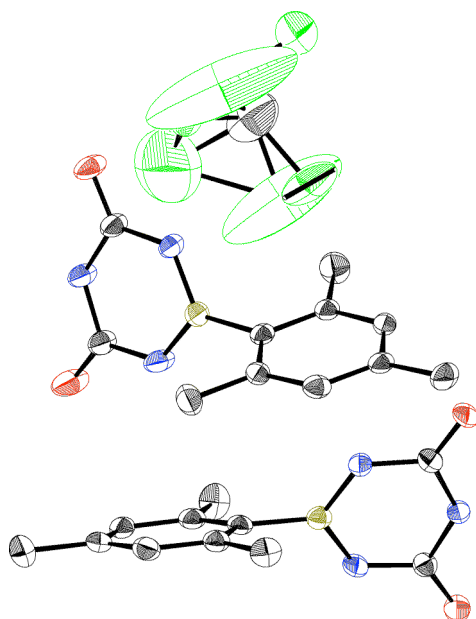

|                                   |                                                                                                                    |
|-----------------------------------|--------------------------------------------------------------------------------------------------------------------|
| Empirical formula                 | C <sub>23</sub> H <sub>29</sub> B <sub>2</sub> N <sub>6</sub> O <sub>4</sub> Cl <sub>3</sub>                       |
| Formula weight                    | 581.49                                                                                                             |
| Temperature                       | 103(2) K                                                                                                           |
| Wavelength                        | 0.71070 Å                                                                                                          |
| Crystal system                    | Triclinic                                                                                                          |
| Space group                       | P-1                                                                                                                |
| Unit cell dimensions              | a = 8.673(4) Å      α = 100.899(5)°<br>b = 10.421(5) Å      β = 94.817(5)°<br>c = 17.737(8) Å      γ = 114.075(6)° |
| Volume                            | 1413.9(12) Å <sup>3</sup>                                                                                          |
| Z                                 | 2                                                                                                                  |
| Density (calculated)              | 1.366 Mg/m <sup>3</sup>                                                                                            |
| Absorption coefficient            | 0.365 mm <sup>-1</sup>                                                                                             |
| F(000)                            | 604                                                                                                                |
| Crystal size                      | 0.40 x 0.30 x 0.20 mm <sup>3</sup>                                                                                 |
| Theta range for data collection   | 2.75 to 25.00°.                                                                                                    |
| Index ranges                      | -10 ≤ h ≤ 10, -12 ≤ k ≤ 12, -14 ≤ l ≤ 21                                                                           |
| Reflections collected             | 9126                                                                                                               |
| Independent reflections           | 4836 [R(int) = 0.0306]                                                                                             |
| Completeness to theta = 25.00°    | 96.7 %                                                                                                             |
| Max. and min. transmission        | 0.9307 and 0.8679                                                                                                  |
| Refinement method                 | Full-matrix least-squares on F <sup>2</sup>                                                                        |
| Data / restraints / parameters    | 4836 / 0 / 377                                                                                                     |
| Goodness-of-fit on F <sup>2</sup> | 1.080                                                                                                              |
| Final R indices [I > 2σ(I)]       | R1 = 0.0854, wR2 = 0.2533                                                                                          |
| R indices (all data)              | R1 = 0.0988, wR2 = 0.2686                                                                                          |
| Largest diff. peak and hole       | 1.956 and -0.824 e.Å <sup>-3</sup>                                                                                 |

**Table S1 2.** Crystallographic data and structure refinement details for **MesT<sub>BN</sub>**.

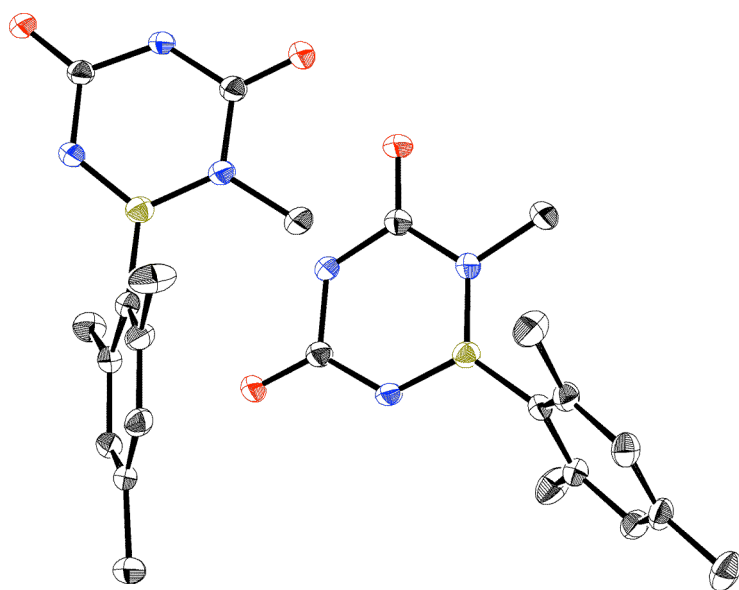

|                                   |                                                                                                                  |
|-----------------------------------|------------------------------------------------------------------------------------------------------------------|
| Empirical formula                 | C <sub>24</sub> H <sub>32</sub> B <sub>2</sub> N <sub>6</sub> O <sub>4</sub>                                     |
| Formula weight                    | 490.18                                                                                                           |
| Temperature                       | 103(2) K                                                                                                         |
| Wavelength                        | 0.71069 Å                                                                                                        |
| Crystal system                    | Triclinic                                                                                                        |
| Space group                       | P-1                                                                                                              |
| Unit cell dimensions              | a = 8.789(5) Å      α = 83.320(5)°<br>b = 12.196(5) Å      β = 86.166(5)°<br>c = 12.799(5) Å      γ = 71.603(5)° |
| Volume                            | 1292.3(10) Å <sup>3</sup>                                                                                        |
| Z                                 | 2                                                                                                                |
| Density (calculated)              | 1.260 Mg/m <sup>3</sup>                                                                                          |
| Absorption coefficient            | 0.086 mm <sup>-1</sup>                                                                                           |
| F(000)                            | 520                                                                                                              |
| Crystal size                      | 0.80 x 0.35 x 0.15 mm <sup>3</sup>                                                                               |
| Theta range for data collection   | 1.60 to 25.00°.                                                                                                  |
| Index ranges                      | -10 ≤ h ≤ 10, -14 ≤ k ≤ 13, -15 ≤ l ≤ 14                                                                         |
| Reflections collected             | 8069                                                                                                             |
| Independent reflections           | 4350 [R(int) = 0.0271]                                                                                           |
| Completeness to theta = 25.00°    | 95.5 %                                                                                                           |
| Absorption correction             | Semi-empirical from equivalents                                                                                  |
| Max. and min. transmission        | 0.9872 and 0.9343                                                                                                |
| Refinement method                 | Full-matrix least-squares on F <sup>2</sup>                                                                      |
| Data / restraints / parameters    | 4350 / 0 / 333                                                                                                   |
| Goodness-of-fit on F <sup>2</sup> | 1.088                                                                                                            |
| Final R indices [I > 2σ(I)]       | R1 = 0.0454, wR2 = 0.1320                                                                                        |
| R indices (all data)              | R1 = 0.0517, wR2 = 0.1384                                                                                        |
| Largest diff. peak and hole       | 0.316 and -0.346 e.Å <sup>-3</sup>                                                                               |

**Table S2-3.** Crystallographic data and structure refinement details for **MesT<sub>BN</sub>•DAP** complex.

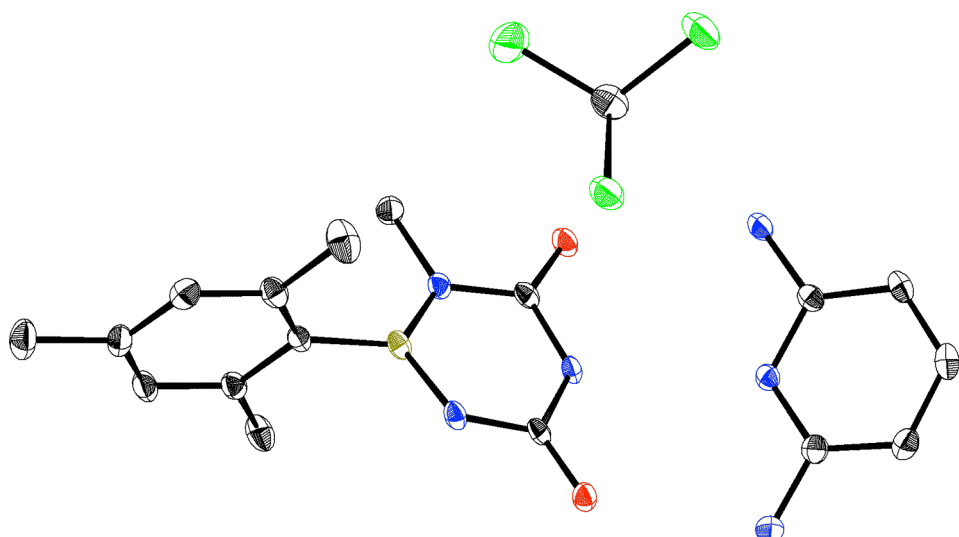

|                                   |                                                                                                                   |
|-----------------------------------|-------------------------------------------------------------------------------------------------------------------|
| Empirical formula                 | C18 H24 B Cl3 N6 O2                                                                                               |
| Formula weight                    | 473.59                                                                                                            |
| Temperature                       | 103(2) K                                                                                                          |
| Wavelength                        | 0.71070 Å                                                                                                         |
| Crystal system                    | Triclinic                                                                                                         |
| Space group                       | P-1                                                                                                               |
| Unit cell dimensions              | a = 8.135(4) Å      α = 68.629(18)°<br>b = 11.106(5) Å      β = 74.897(19)°<br>c = 14.144(6) Å      γ = 77.76(2)° |
| Volume                            | 1139.1(9) Å <sup>3</sup>                                                                                          |
| Z                                 | 2                                                                                                                 |
| Density (calculated)              | 1.381 Mg/m <sup>3</sup>                                                                                           |
| Absorption coefficient            | 0.429 mm <sup>-1</sup>                                                                                            |
| F(000)                            | 492                                                                                                               |
| Crystal size                      | 0.50 x 0.50 x 0.20 mm <sup>3</sup>                                                                                |
| Theta range for data collection   | 2.62 to 25.00°.                                                                                                   |
| Index ranges                      | -9 ≤ h ≤ 9, -13 ≤ k ≤ 13, -16 ≤ l ≤ 16                                                                            |
| Reflections collected             | 7337                                                                                                              |
| Independent reflections           | 3904 [R(int) = 0.1014]                                                                                            |
| Completeness to theta = 25.00°    | 97.3 %                                                                                                            |
| Absorption correction             | Semi-empirical from equivalents                                                                                   |
| Max. and min. transmission        | 0.9191 and 0.8140                                                                                                 |
| Refinement method                 | Full-matrix least-squares on F <sup>2</sup>                                                                       |
| Data / restraints / parameters    | 3904 / 0 / 307                                                                                                    |
| Goodness-of-fit on F <sup>2</sup> | 0.801                                                                                                             |
| Final R indices [I > 2σ(I)]       | R1 = 0.0669, wR2 = 0.1657                                                                                         |
| R indices (all data)              | R1 = 0.0835, wR2 = 0.1725                                                                                         |
| Largest diff. peak and hole       | 0.452 and -0.479 e.Å <sup>-3</sup>                                                                                |



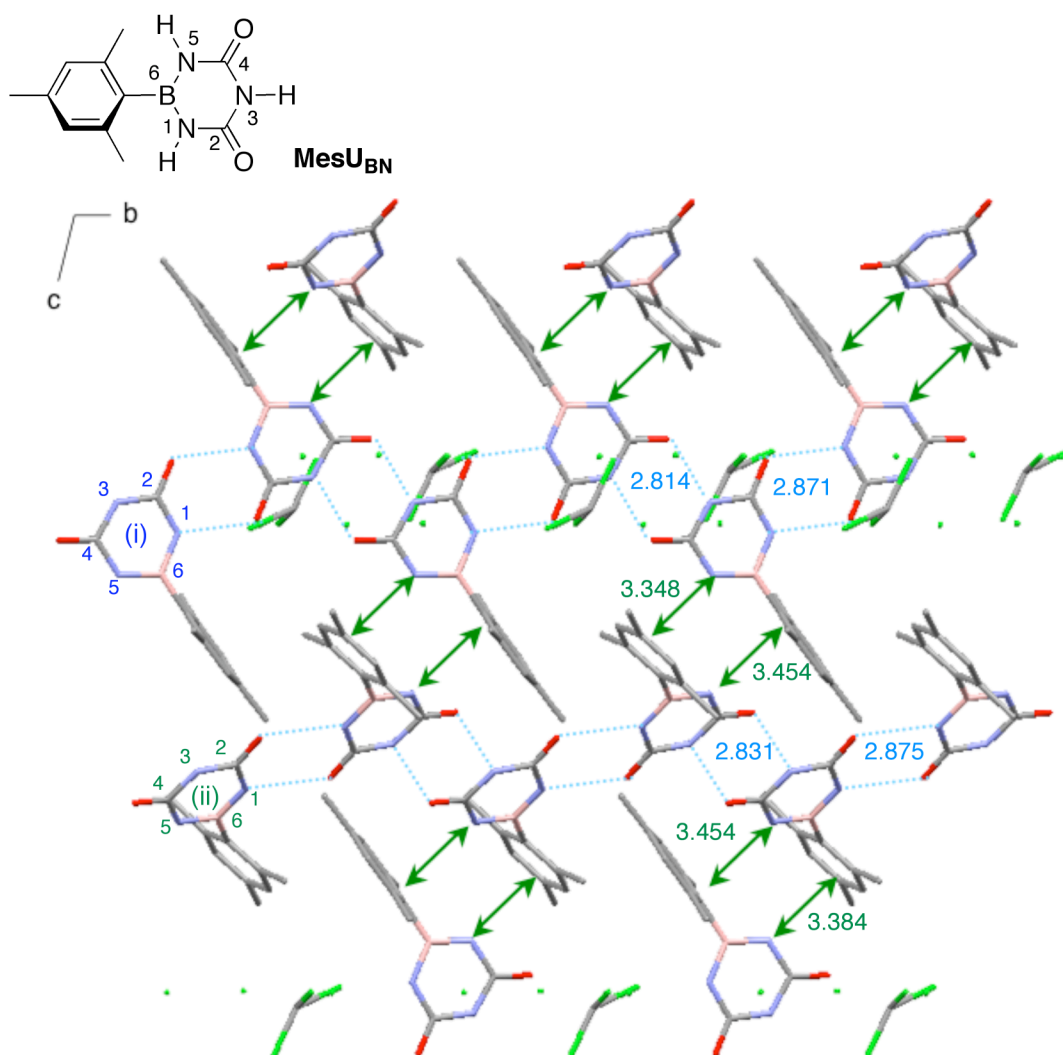

Bond Length / Å

|                                | (i)      | (ii)     |
|--------------------------------|----------|----------|
| N <sub>1</sub> —C <sub>2</sub> | 1.366(5) | 1.365(4) |
| C <sub>2</sub> —N <sub>3</sub> | 1.374(4) | 1.375(4) |
| N <sub>3</sub> —C <sub>4</sub> | 1.374(4) | 1.374(4) |
| C <sub>4</sub> —N <sub>5</sub> | 1.370(5) | 1.375(4) |
| N <sub>5</sub> —B <sub>6</sub> | 1.429(5) | 1.427(5) |
| B <sub>6</sub> —N <sub>1</sub> | 1.422(5) | 1.418(5) |
| C <sub>2</sub> =O              | 1.224(4) | 1.230(4) |
| C <sub>4</sub> =O              | 1.225(4) | 1.221(4) |

Bond Angle / °

|                                                | (i)      | (ii)     |
|------------------------------------------------|----------|----------|
| B <sub>6</sub> —N <sub>1</sub> —C <sub>2</sub> | 124.4(3) | 124.0(3) |
| N <sub>1</sub> —C <sub>2</sub> —N <sub>3</sub> | 115.0(3) | 115.1(3) |
| C <sub>2</sub> —N <sub>3</sub> —C <sub>4</sub> | 126.9(3) | 127.4(3) |
| N <sub>3</sub> —C <sub>4</sub> —N <sub>5</sub> | 115.6(3) | 114.7(3) |
| C <sub>4</sub> —N <sub>5</sub> —B <sub>6</sub> | 123.5(3) | 123.8(3) |
| N <sub>5</sub> —B <sub>6</sub> —N <sub>1</sub> | 114.6(3) | 114.9(3) |

**Figure S1.** Crystal structure of MesUBN.

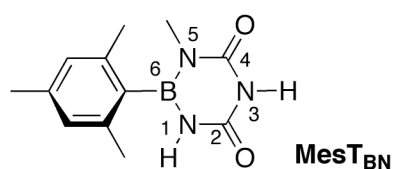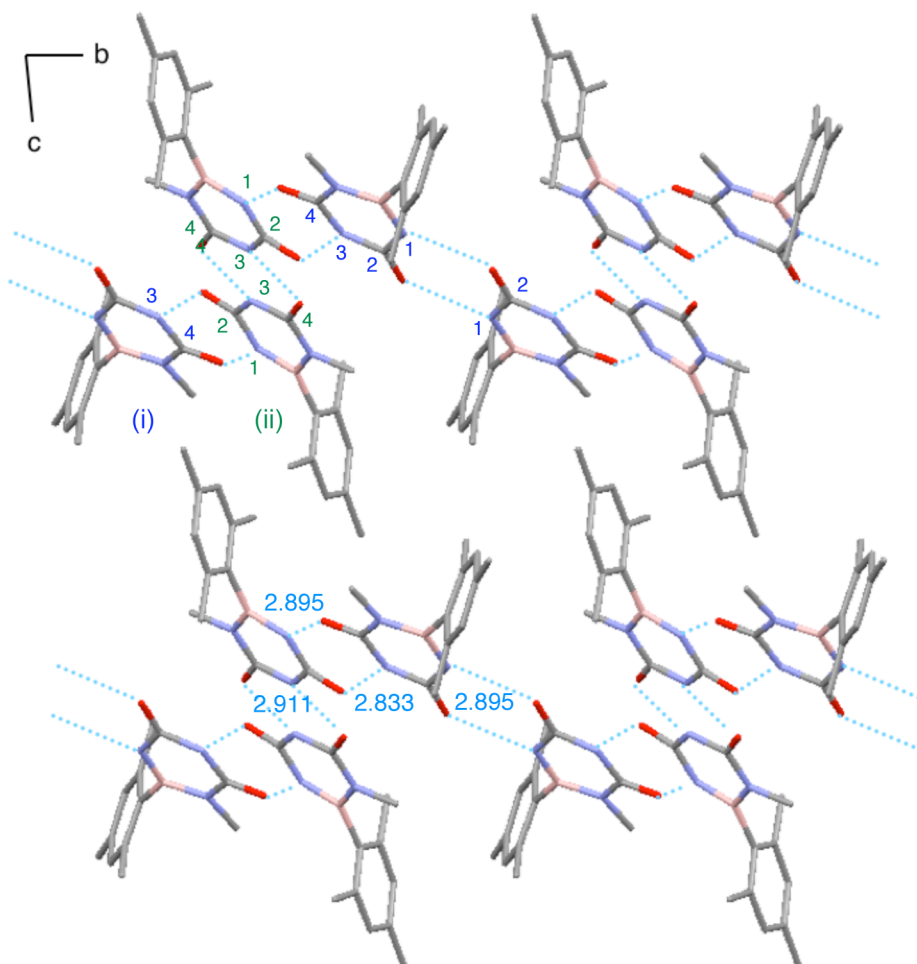

Bond Length / Å

|                                | (i)        | (ii)       |
|--------------------------------|------------|------------|
| N <sub>1</sub> –C <sub>2</sub> | 1.361(2)   | 1.358(2)   |
| C <sub>2</sub> –N <sub>3</sub> | 1.380(2)   | 1.380(2)   |
| N <sub>3</sub> –C <sub>4</sub> | 1.382(2)   | 1.379(2)   |
| C <sub>4</sub> –N <sub>5</sub> | 1.375(2)   | 1.377(2)   |
| N <sub>5</sub> –B <sub>6</sub> | 1.442(2)   | 1.436(2)   |
| B <sub>6</sub> –N <sub>1</sub> | 1.422(2)   | 1.428(2)   |
| C <sub>2</sub> =O              | 1.2264(19) | 1.2270(19) |
| C <sub>4</sub> =O              | 1.223(2)   | 1.225(2)   |

Bond Angle / °

|                                                | (i)        | (ii)       |
|------------------------------------------------|------------|------------|
| B <sub>6</sub> –N <sub>1</sub> –C <sub>2</sub> | 124.02(14) | 124.88(13) |
| N <sub>1</sub> –C <sub>2</sub> –N <sub>3</sub> | 115.03(13) | 114.54(13) |
| C <sub>2</sub> –N <sub>3</sub> –C <sub>4</sub> | 127.01(13) | 126.90(13) |
| N <sub>3</sub> –C <sub>4</sub> –N <sub>5</sub> | 115.91(13) | 116.25(14) |
| C <sub>4</sub> –N <sub>5</sub> –B <sub>6</sub> | 121.96(13) | 122.08(13) |
| N <sub>5</sub> –B <sub>6</sub> –N <sub>1</sub> | 115.81(15) | 115.07(14) |

**Figure S2.** Crystal structure of MesT<sub>BN</sub>.

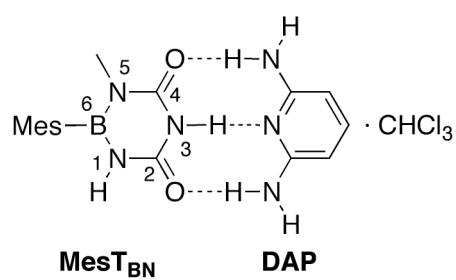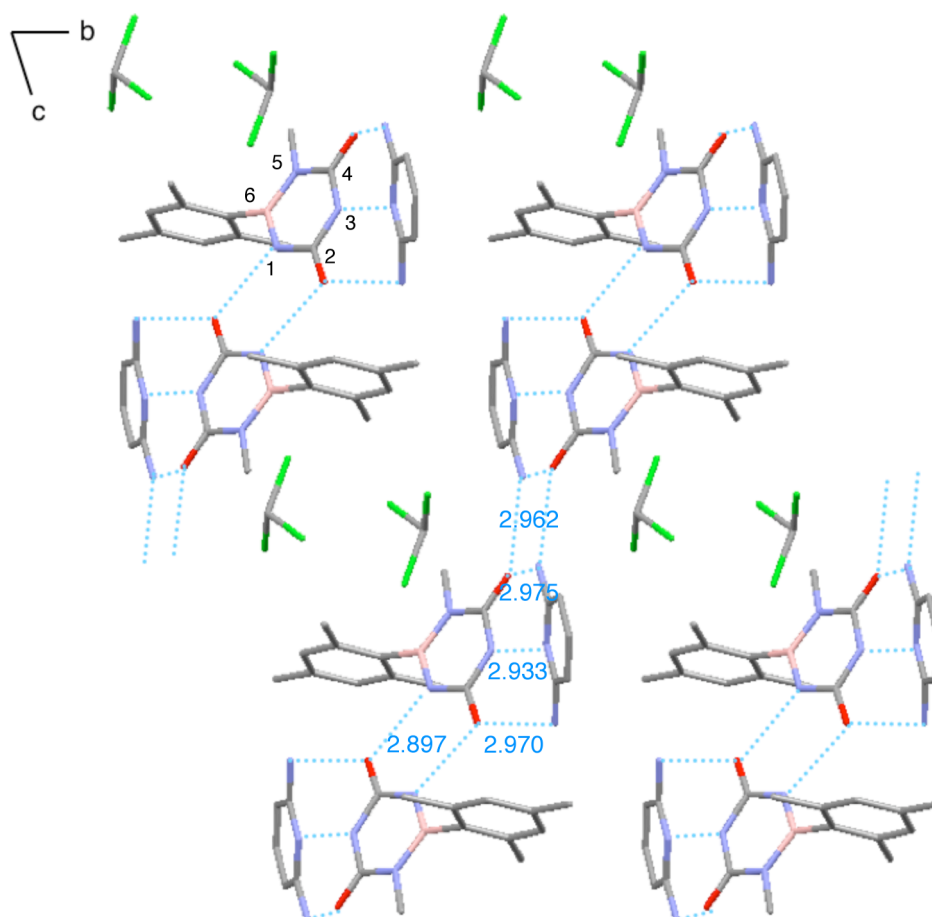

| Bond Length / Å                |          | Bond Angle / °                                 |            |
|--------------------------------|----------|------------------------------------------------|------------|
| N <sub>1</sub> —C <sub>2</sub> | 1.360(3) | B <sub>6</sub> —N <sub>1</sub> —C <sub>2</sub> | 123.84(19) |
| C <sub>2</sub> —N <sub>3</sub> | 1.374(3) | N <sub>1</sub> —C <sub>2</sub> —N <sub>3</sub> | 115.5(2)   |
| N <sub>3</sub> —C <sub>4</sub> | 1.385(3) | C <sub>2</sub> —N <sub>3</sub> —C <sub>4</sub> | 126.26(19) |
| C <sub>4</sub> —N <sub>5</sub> | 1.371(3) | N <sub>3</sub> —C <sub>4</sub> —N <sub>5</sub> | 116.47(19) |
| N <sub>5</sub> —B <sub>6</sub> | 1.440(3) | C <sub>4</sub> —N <sub>5</sub> —B <sub>6</sub> | 121.7(2)   |
| B <sub>6</sub> —N <sub>1</sub> | 1.425(3) | N <sub>5</sub> —B <sub>6</sub> —N <sub>1</sub> | 115.7(2)   |
| C <sub>2</sub> =O              | 1.235(3) |                                                |            |
| C <sub>4</sub> =O              | 1.228(3) |                                                |            |

**Figure S3.** Crystal structure of **MesT<sub>BN</sub>·DAP** complex.

\*\*\* CLASS-5000 \*\*\* レポート番号 : 1 データファイル名 : KY054.D01 09/09/16 22:22:03  
 サンプル名 : KY054-ThxUBN  
 サンプルID :  
 サンプル量 : 1  
 希釈率 : 1  
 タイプ : 未知試料  
 サンプル名 : ito  
 メソッドファイル名 : DI.MET  
 ピーク番号 : 1  
 パーセント :

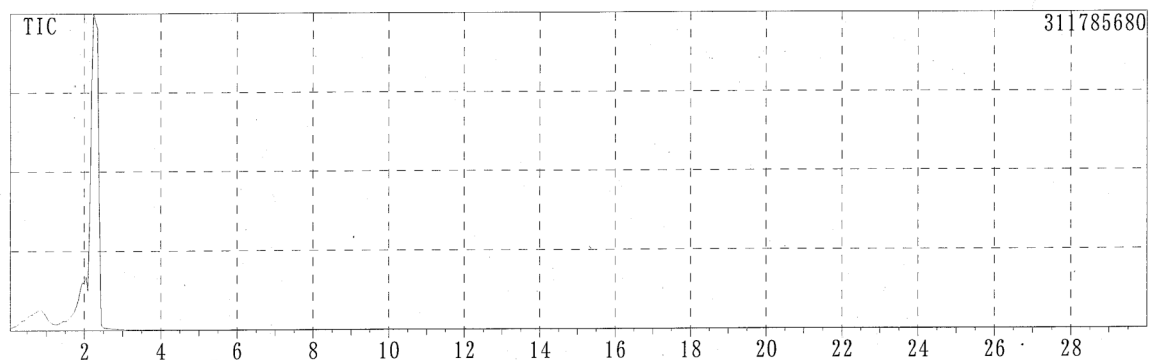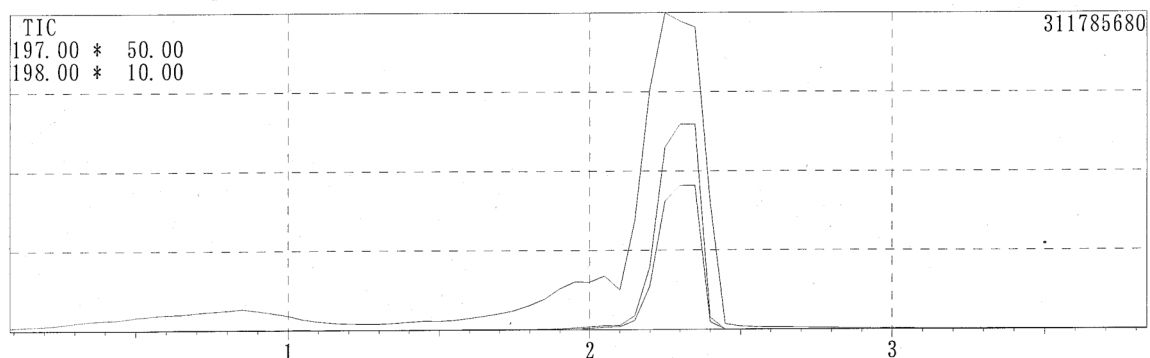

スキャン番号 : 46  
 ピーク数 : 259 保持時間 : 2.300  
 ベースピーク : 155.10 ( 37295116)

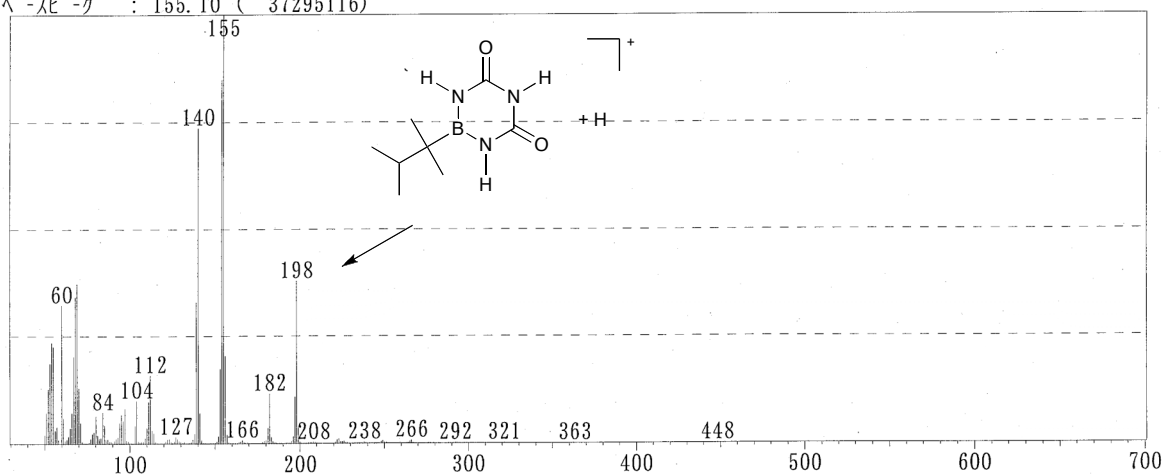

**Figure S4.** EI-MS spectrum of **ThxU<sub>BN</sub>** recorded using a Shimadzu GCMS-QP5000 spectrometer with a direct inlet system.

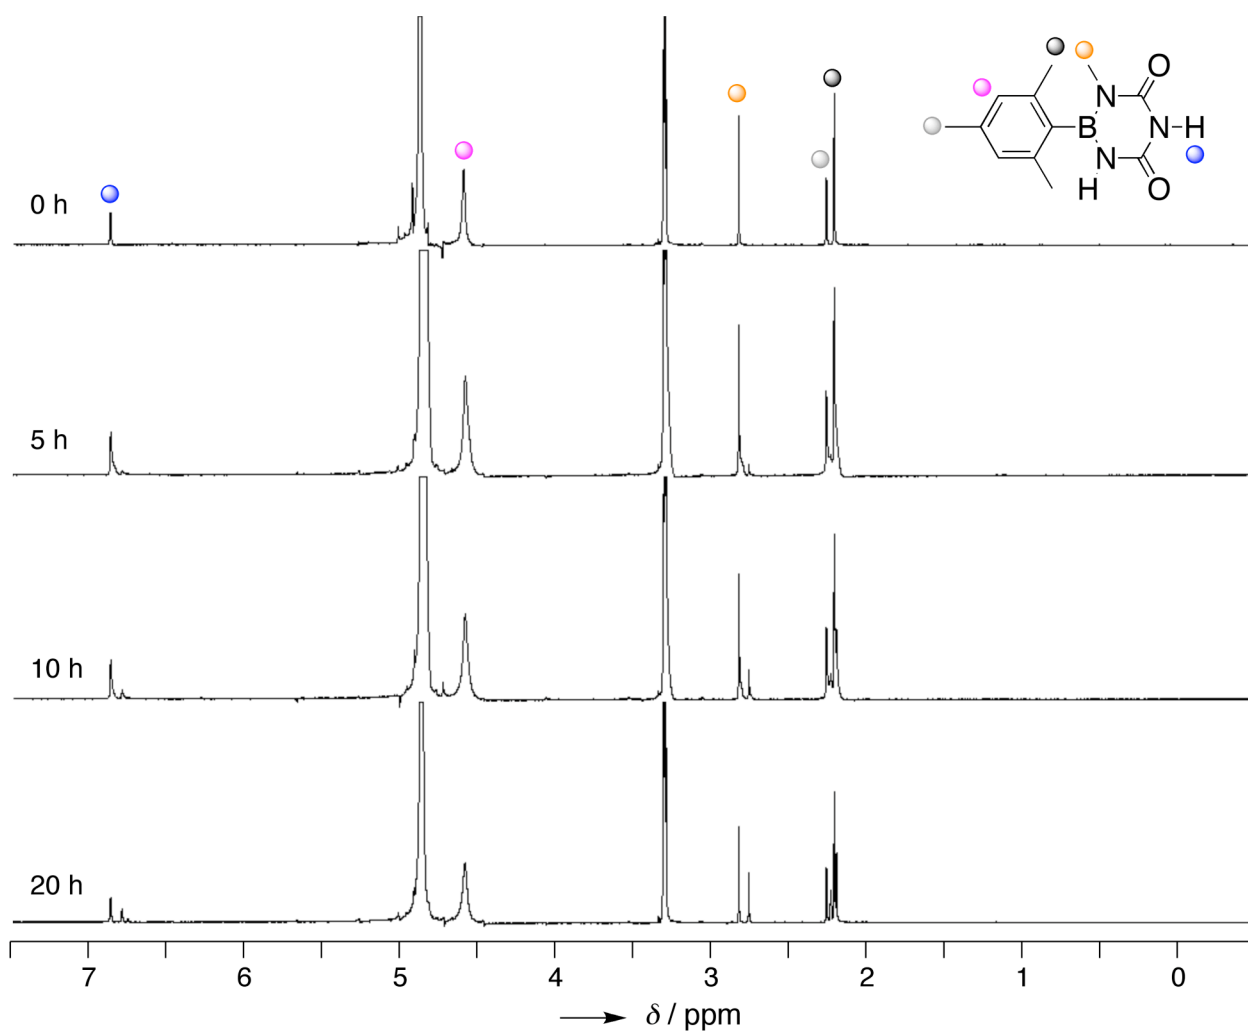

**Figure S5.** Time dependent  $^1\text{H}$  NMR spectra of MesT<sub>BN</sub> in  $\text{CD}_3\text{OD}$  (6.0 mM) at 60 °C (bath temperature).

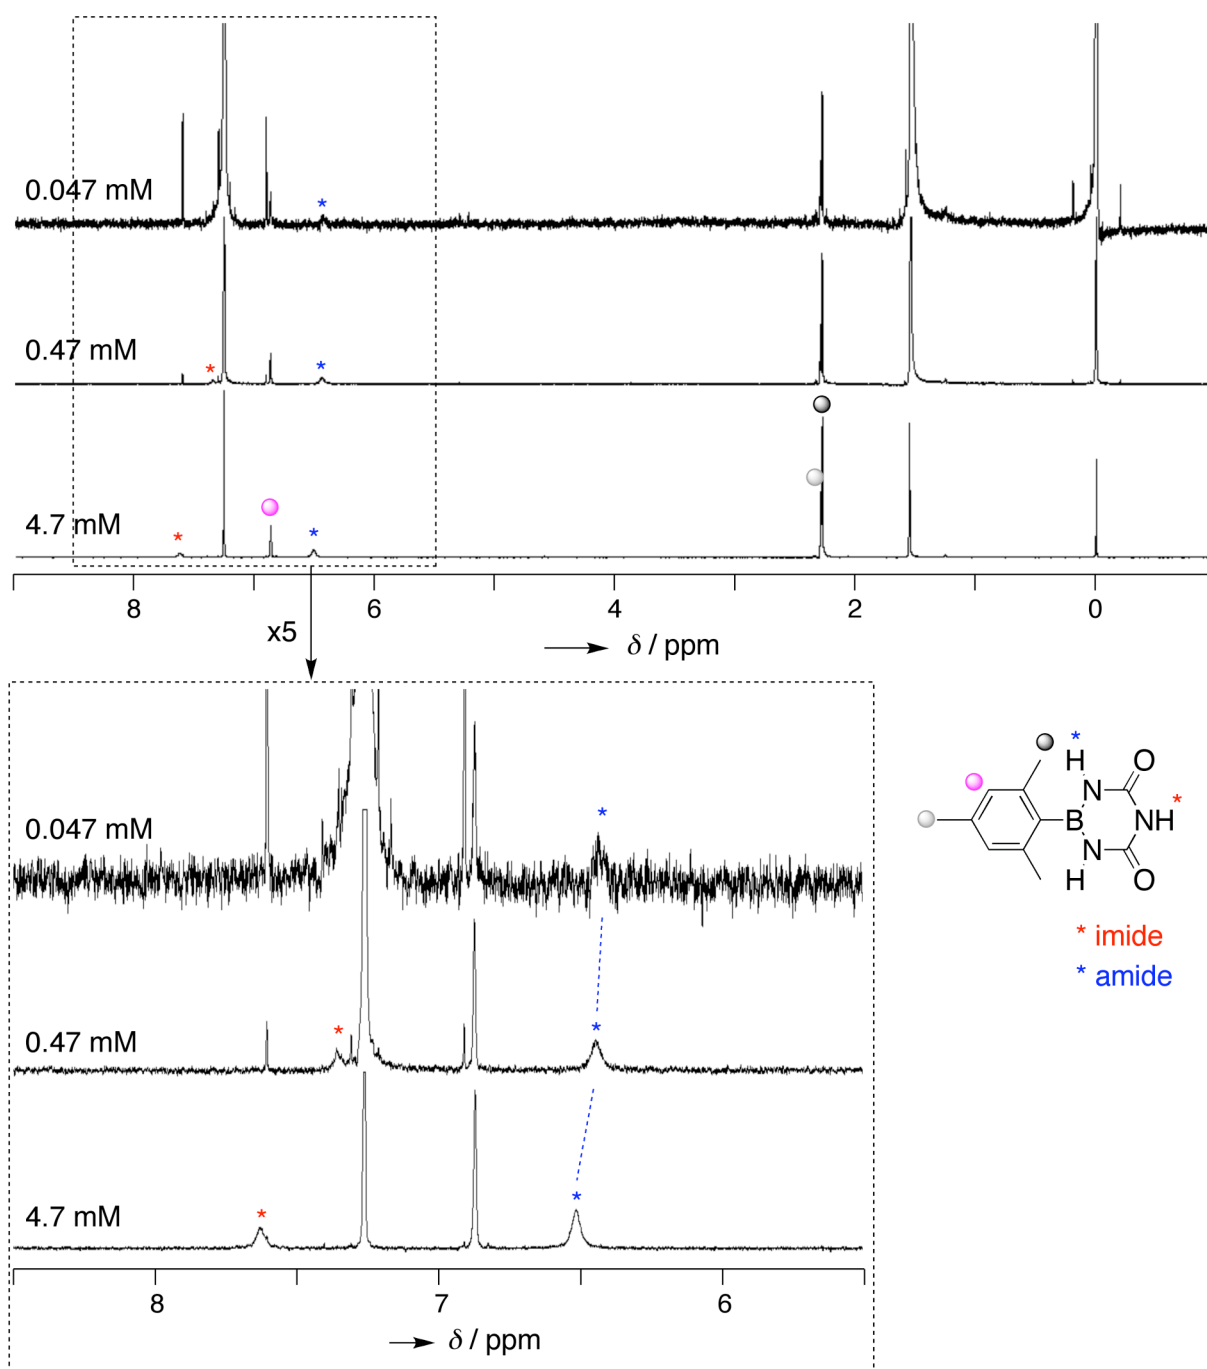

**Figure S6.**  $^1\text{H}$  NMR spectra of **MesU<sub>BN</sub>** at various concentrations in  $\text{CDCl}_3$  at rt..

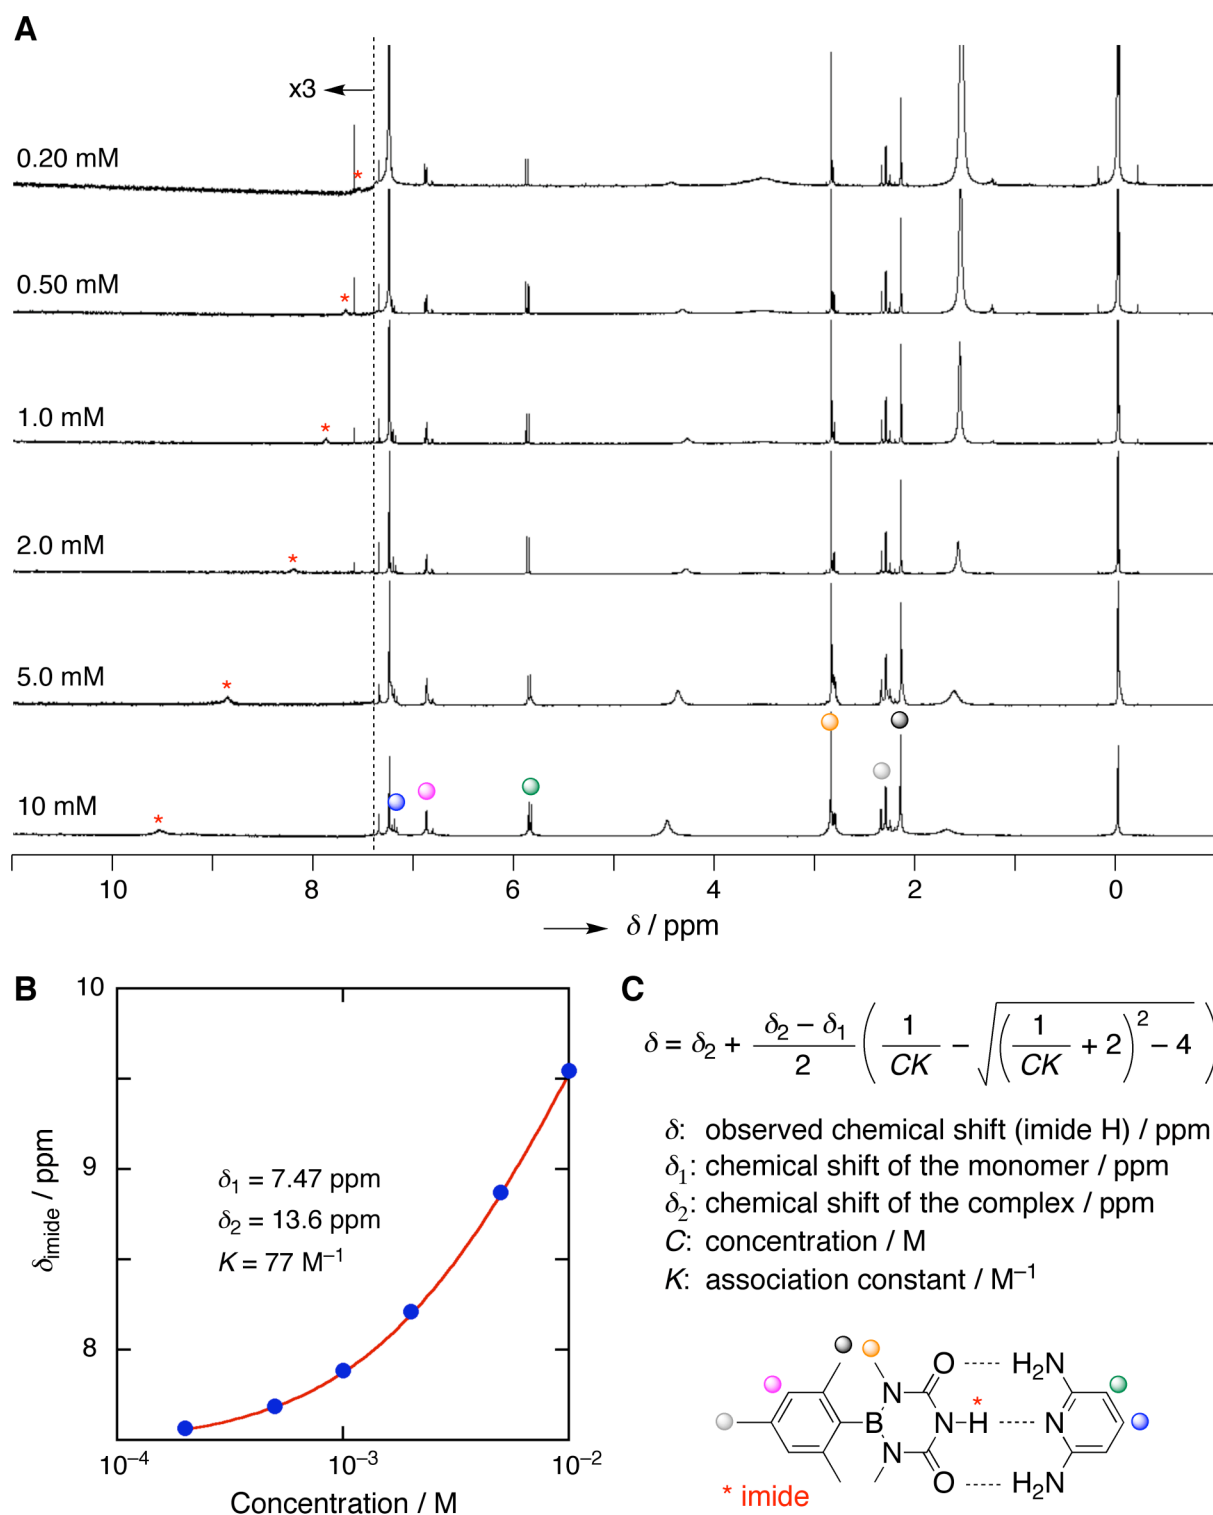

**Figure S7.** Association constant of **MesT<sub>BN</sub>-DAP** complex in CDCl<sub>3</sub> at 25 °C; A, <sup>1</sup>H NMR spectra of **MesT<sub>BN</sub>-DAP** complex at various concentrations. B, Chemical shift of the imide proton (asterisk). Curvefitting was performed by using KalidaGraph 4.0 by incorporating the equation C.

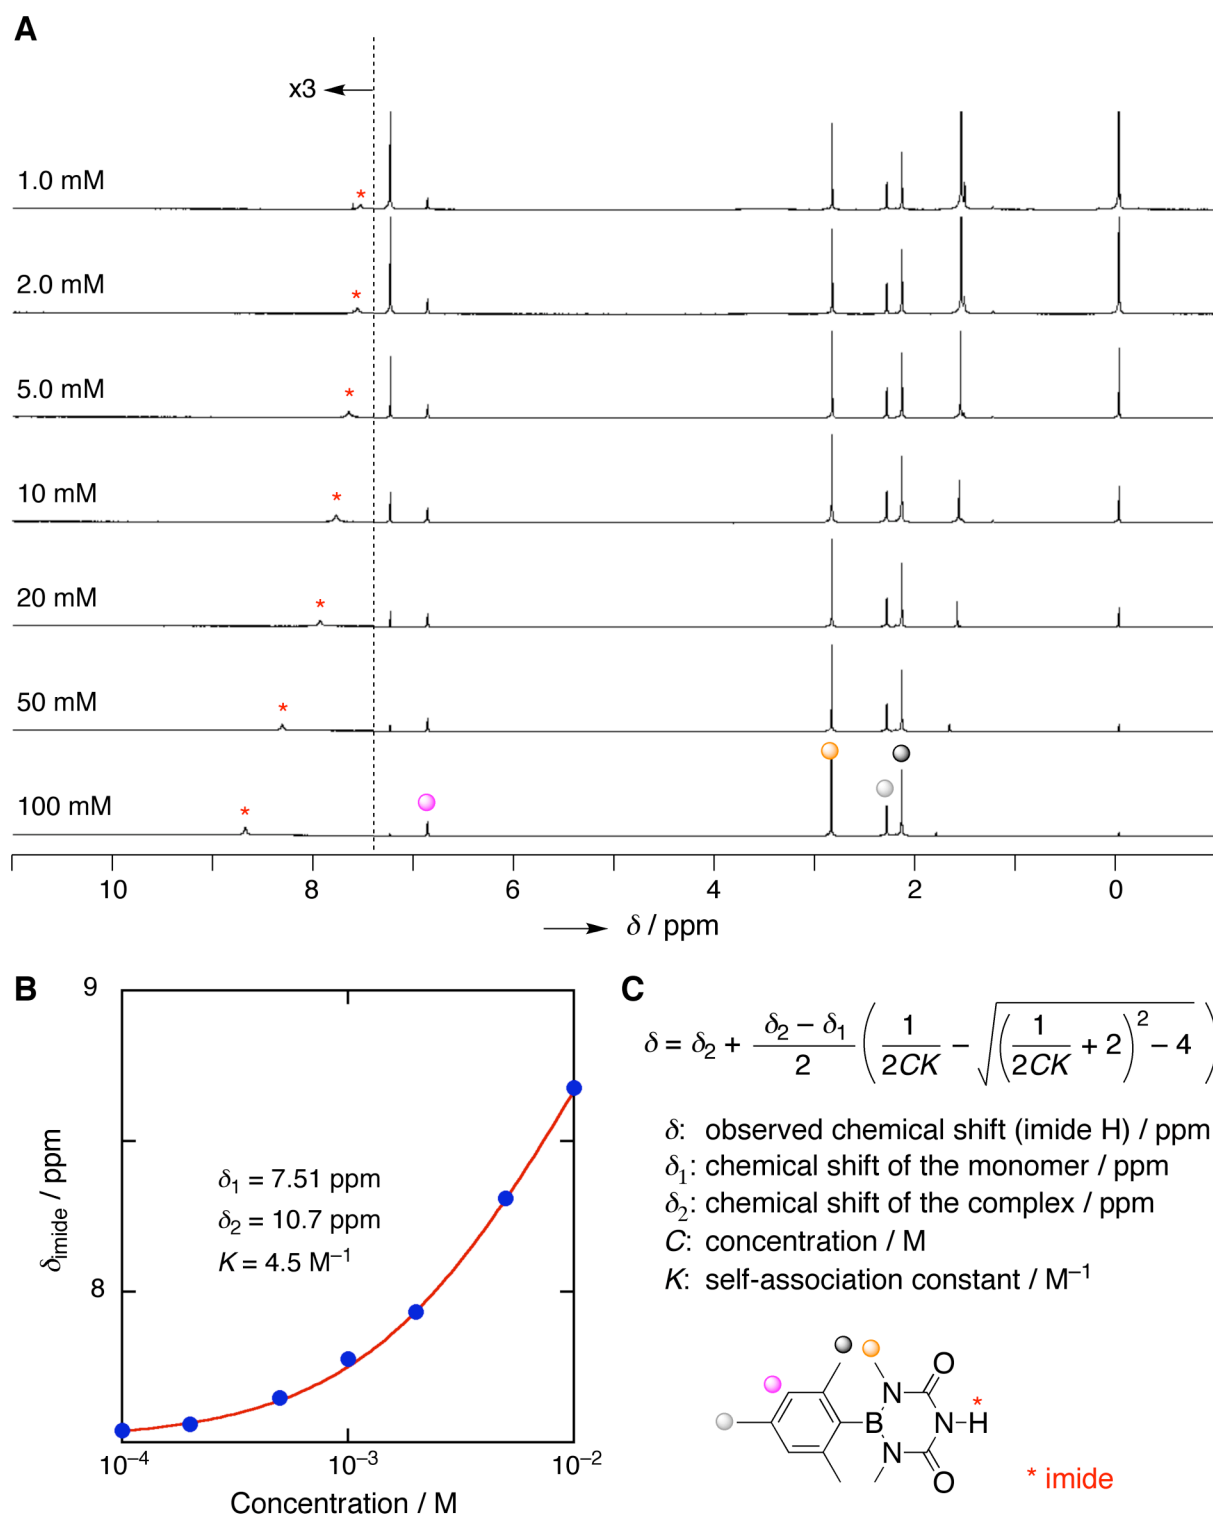

**Figure S8.** Self-association constant of **MesT<sub>BN</sub>** in CDCl<sub>3</sub> at 25 °C; A, <sup>1</sup>H NMR spectra of **MesT<sub>BN</sub>** at various concentrations. B, Chemical shift of the imide proton (asterisk). Curvefitting was performed by using KalidaGraph 4.0 by incorporating the equation C.



## 5. IR data of MesU<sub>BN</sub>, T<sub>BN</sub>s and thymine

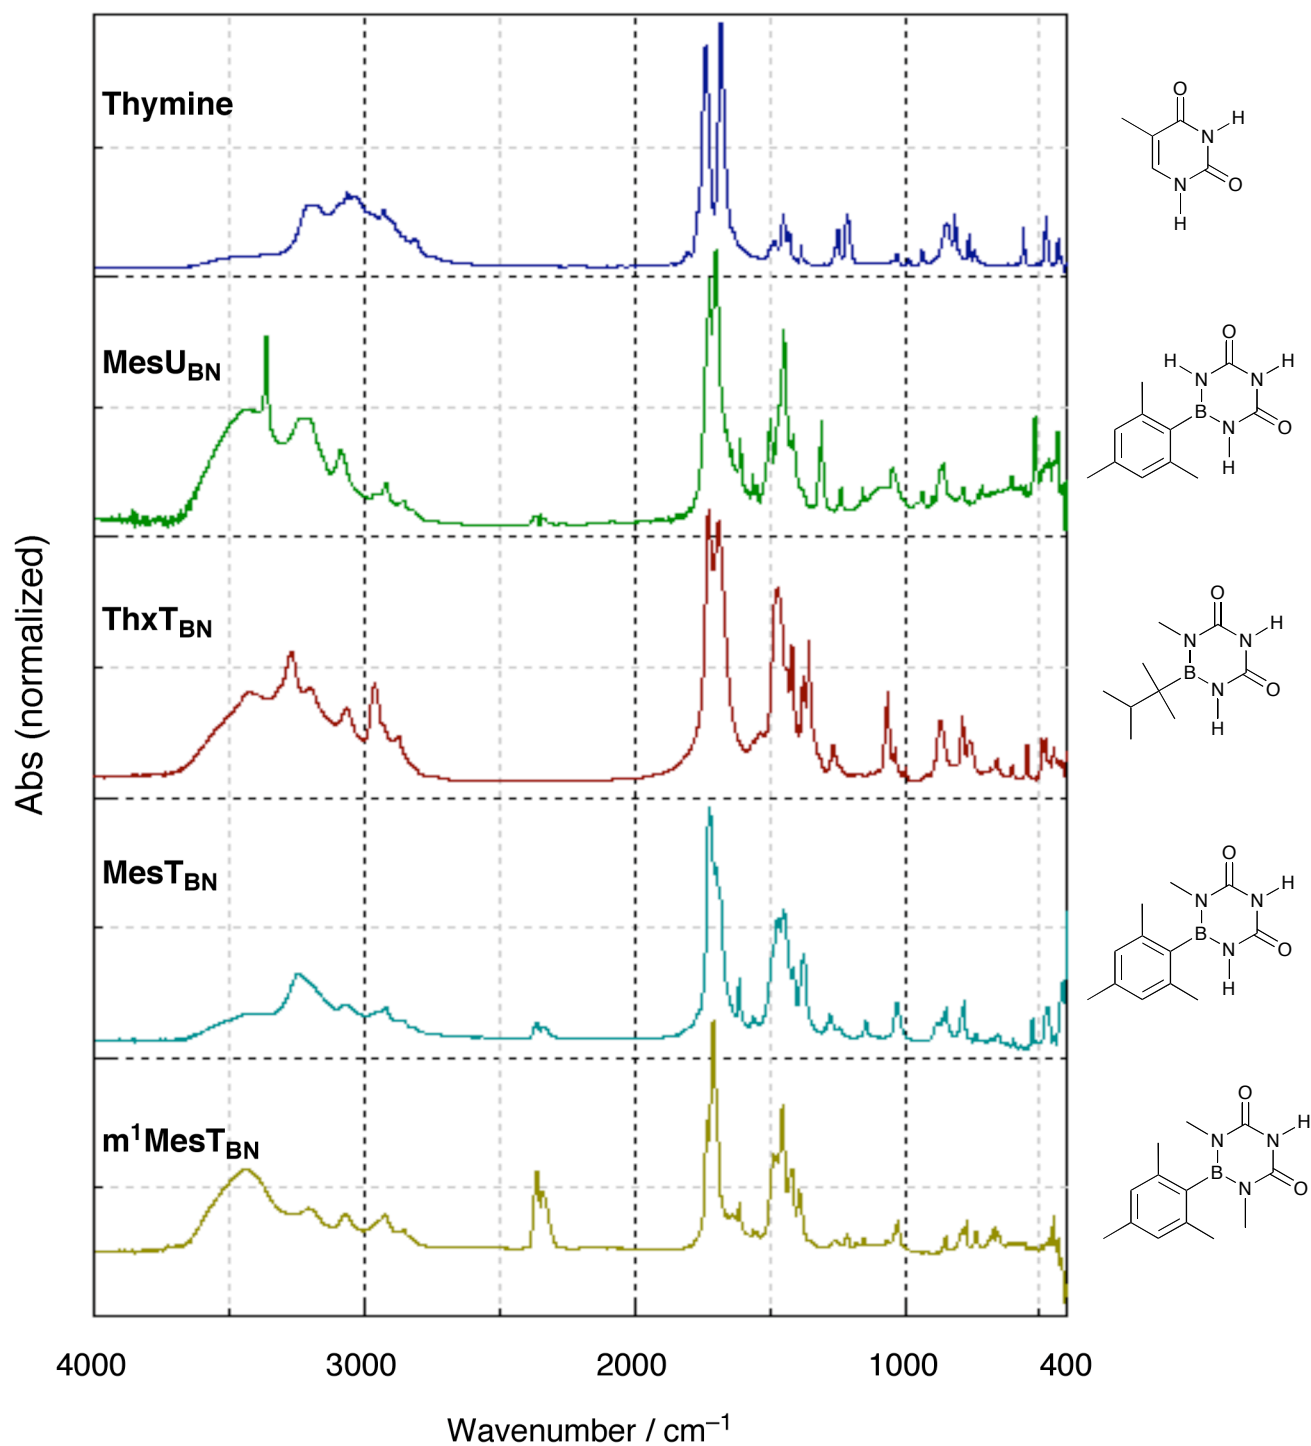

**Figure S9.** IR spectra of MesU<sub>BN</sub> and T<sub>BN</sub>s, and thymine (KBr).

## 6. NMR data

### MesU<sub>BN</sub> <sup>1</sup>H NMR

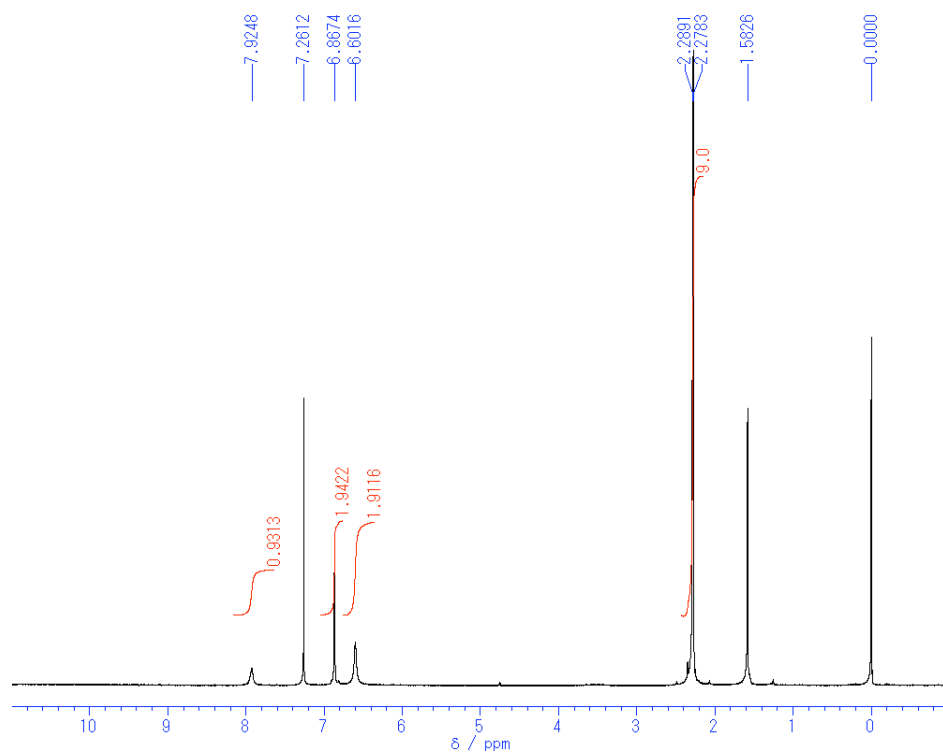

### MesU<sub>BN</sub> <sup>13</sup>C NMR

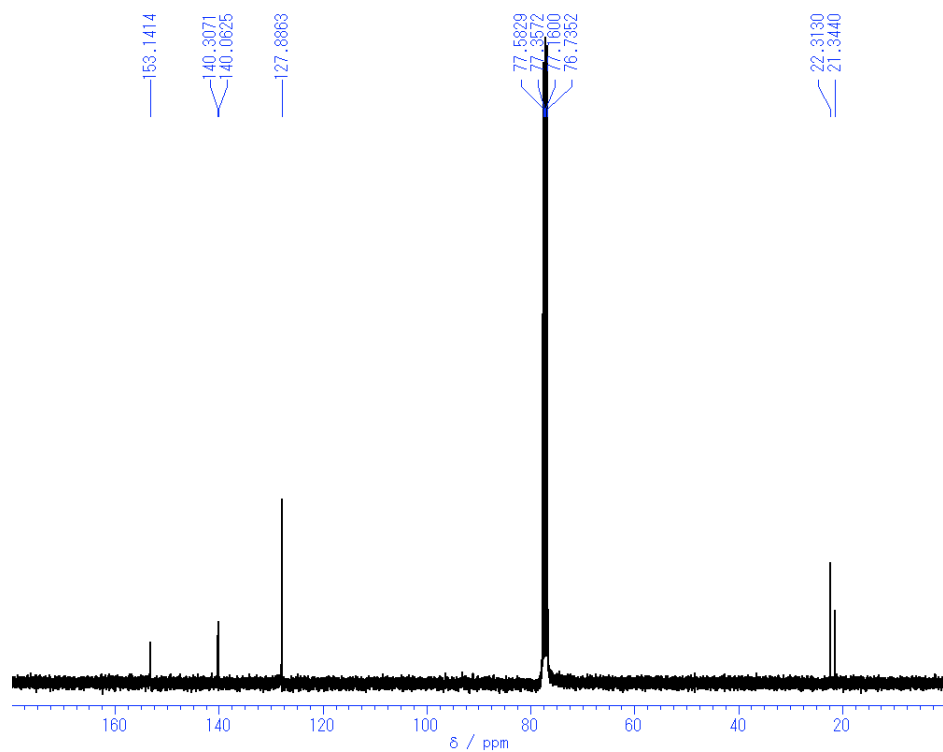

**MesU<sub>BN</sub>** <sup>11</sup>B NMR

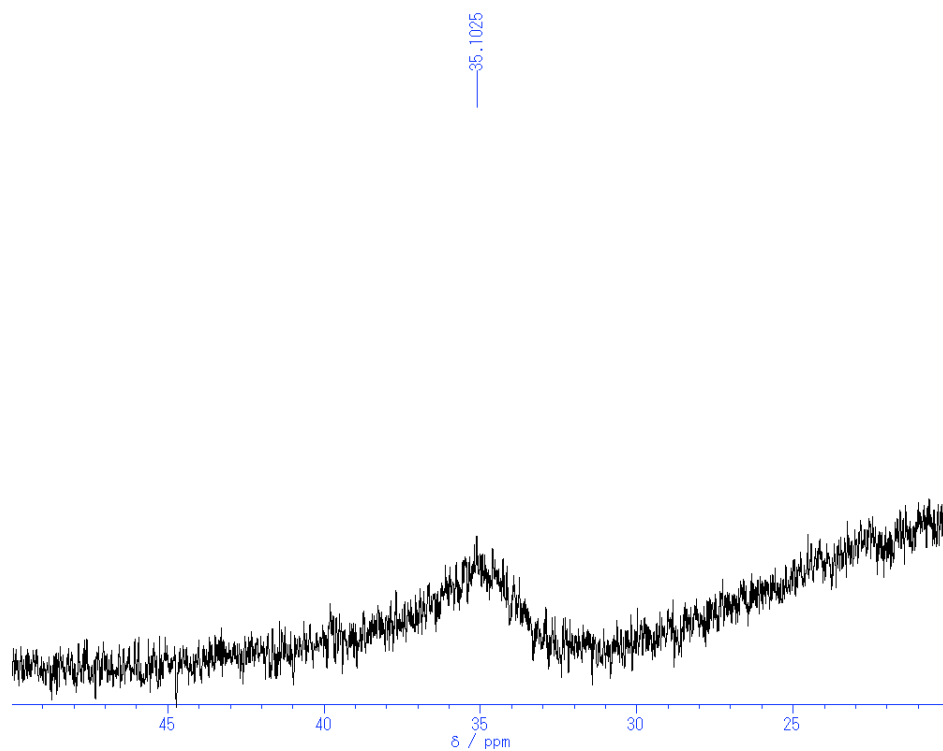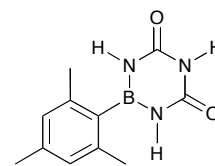

**MesT<sub>BN</sub>** <sup>1</sup>H NMR

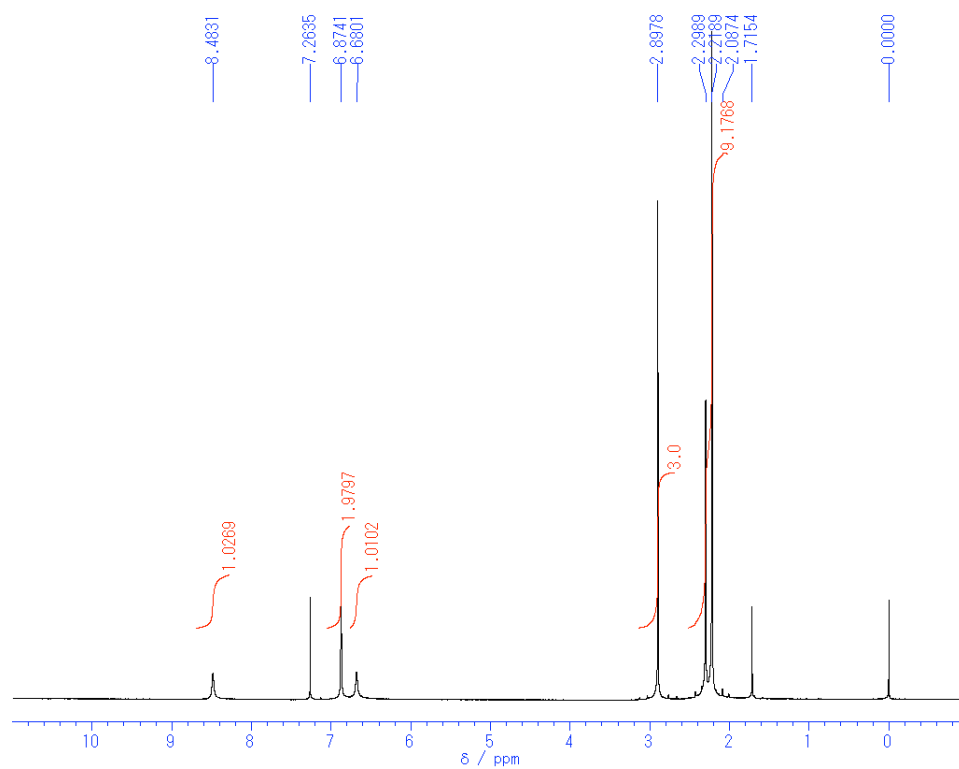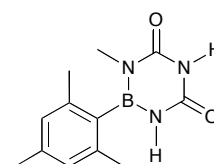

**MesT<sub>BN</sub>** <sup>13</sup>C NMR

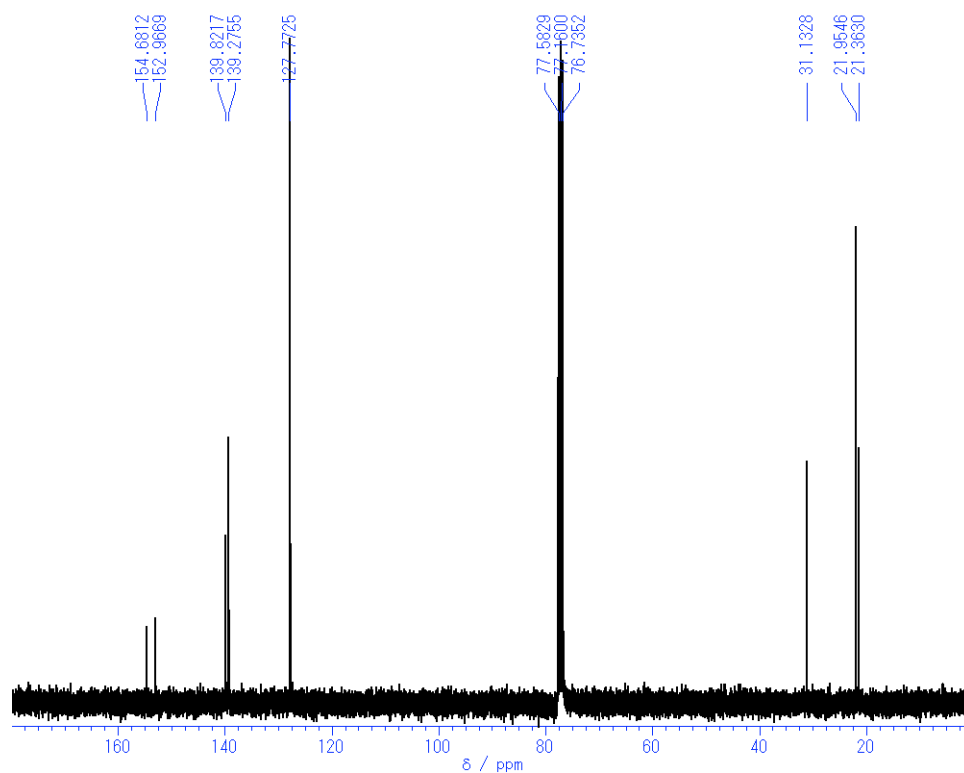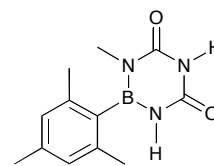

**MesT<sub>BN</sub>** <sup>11</sup>B NMR

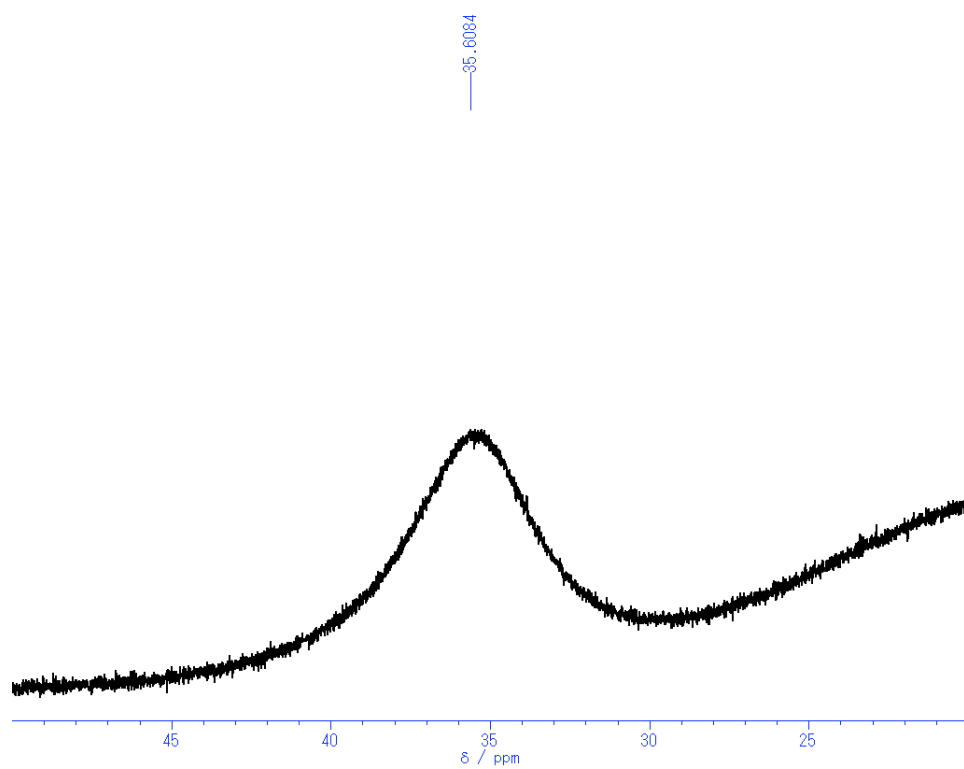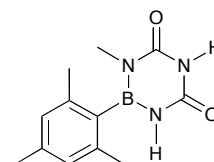

**m<sup>1</sup>MesT<sub>BN</sub>** <sup>1</sup>H NMR

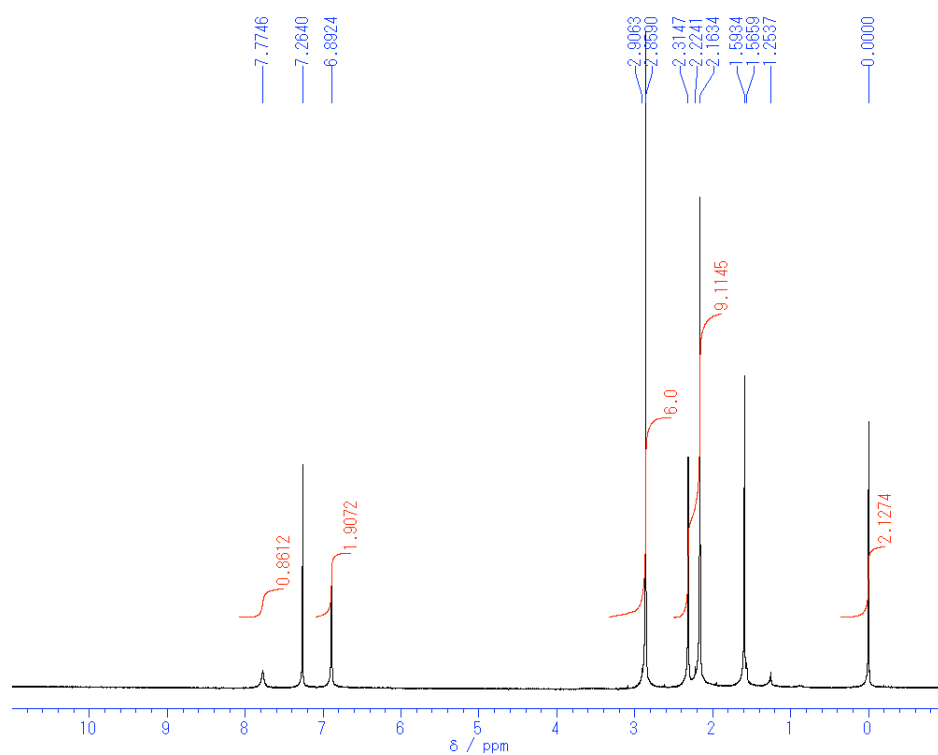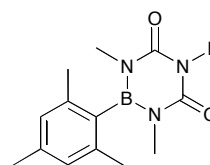

**m<sup>1</sup>MesT<sub>BN</sub>** <sup>13</sup>C NMR

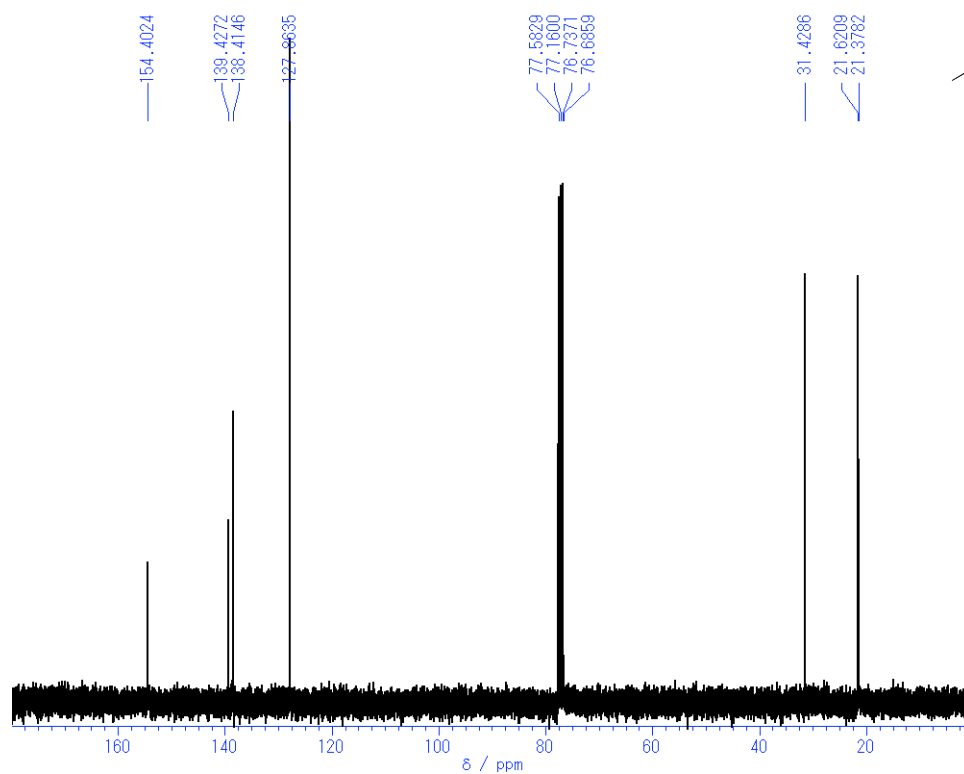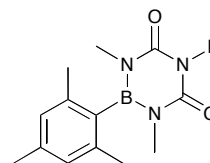

**m<sup>1</sup>MesT<sub>BN</sub> <sup>11</sup>B NMR**

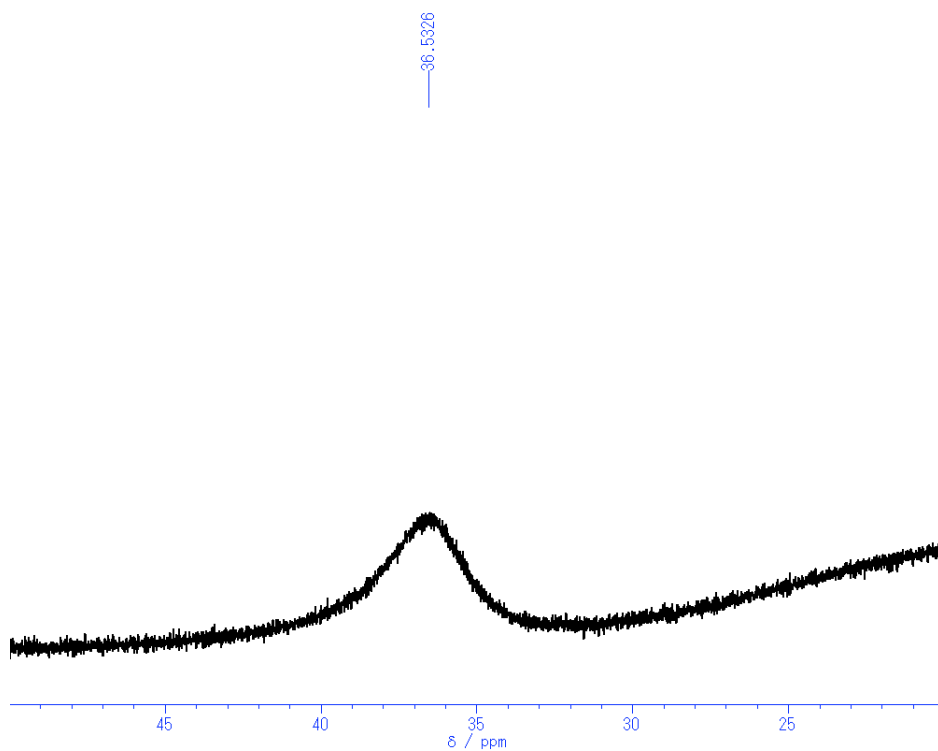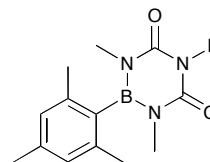

**ThxT<sub>BN</sub> <sup>1</sup>H NMR**

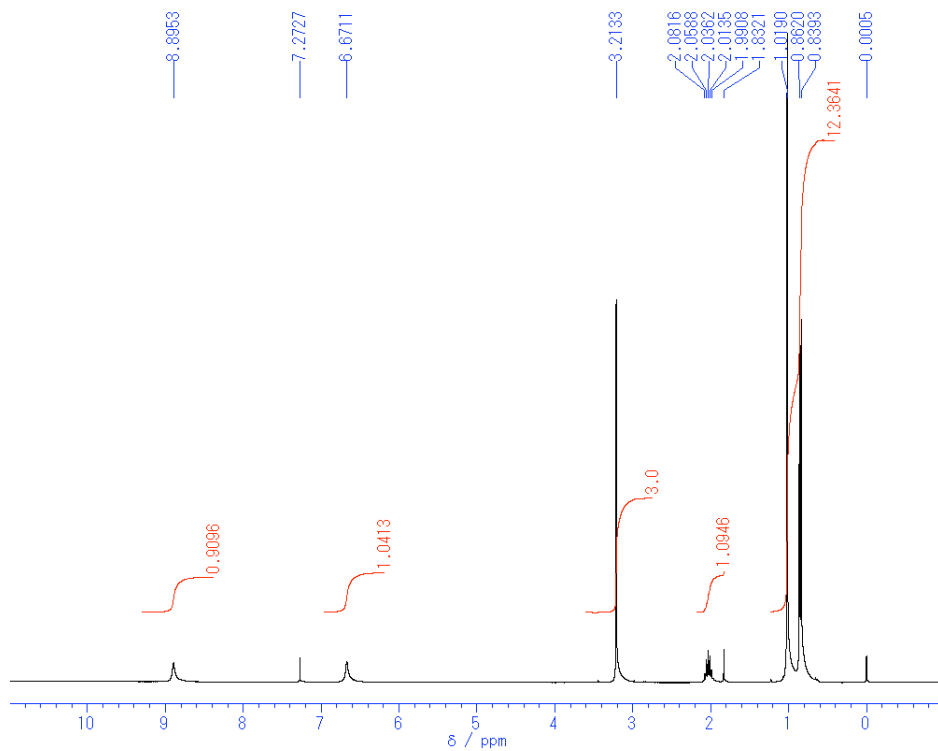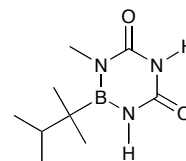

**ThxT<sub>BN</sub>** <sup>13</sup>C NMR

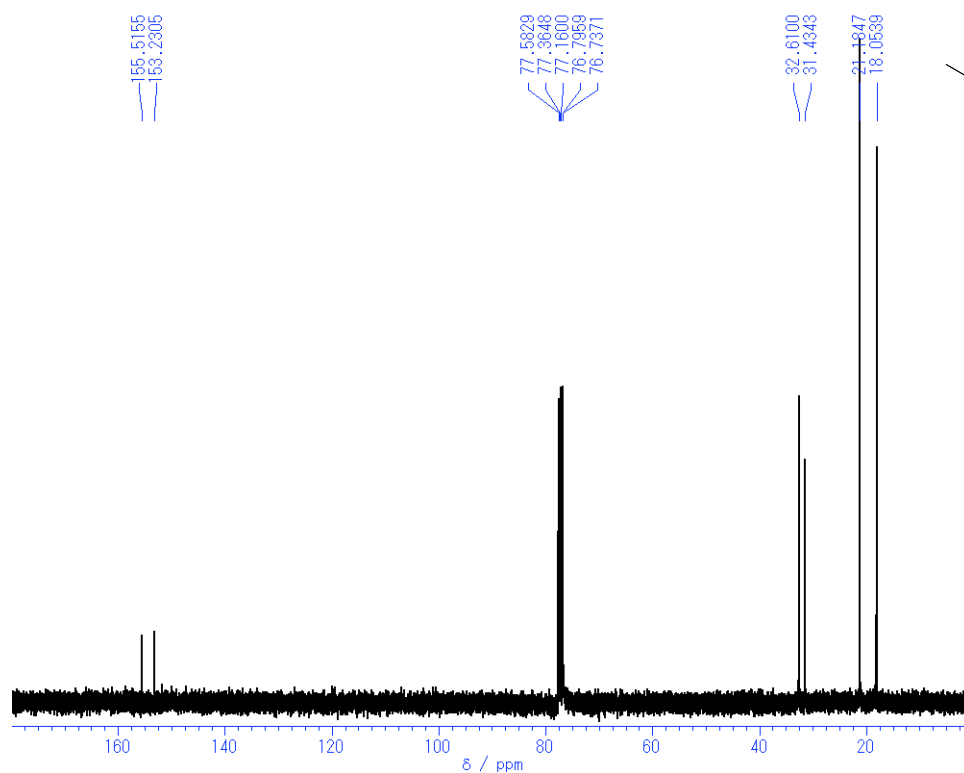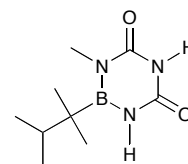

**ThxT<sub>BN</sub>** <sup>11</sup>B NMR

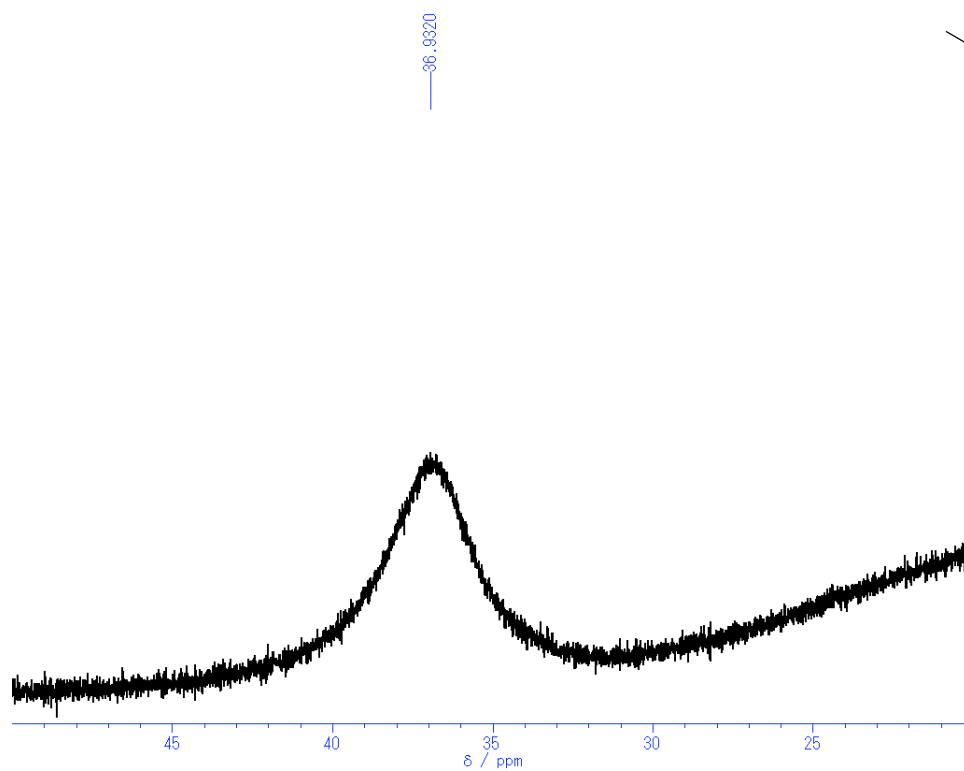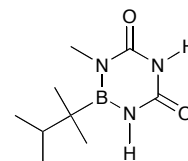

Supplement: Supplementary file 1 [file 4423873]
